# Supplementary material
Source: HighWire-hosted journal article supplement (https://bmjopenquality.bmj.com/highwire/filestream/136095/field_highwire_adjunct_files/2/ds5810.docx)
Supplement: ds5810.docx [file ds5810.docx]

**Final Questionnaire results**

| **Which AWP locality do you work in or are attached to?** |  |
| --- | --- |
| Banes | 5 |
| Bristol | 13 |
| Salisbury | 4 |
| Devizes | 3 |
| Bath | 5 |
| North Bristol | 3 |
| North Somerset | 3 |
| Secure | 3 |
| South Glos | 3 |
| STEPS | 1 |
| Swindon | 6 |
| Wiltshire | 5 |
| Total | 54 |

| **What grade are you?** |  |
| --- | --- |
| FY1 | 3 |
| FY2 | 3 |
| GP trainee | 2 |
| Core trainee | 13 |
| ST4-6 | 4 |
| Specialty trainee | 2 |
| Specialty doctor | 5 |
| Consultant | 22 |
| Total | 54 |

| **Do you know if you have access to TOXBASE?** |  |
| --- | --- |
| No | 34 |
| Yes | 20 |

| **Do you know where you can find your username?** |  |
| --- | --- |
| No | 39 |
| Yes | 15 |

| Have you used TOXBASE in the last 3 months? |  |
| --- | --- |
| No | 49 |
| Yes | 5 |

| **If you have, please can you give an example of when it has been useful?** | |
| --- | --- |
| - overdose on the ward |  |
| - overdose on the ward |  |
| - Not needed but glad I know I have access, I hope I could find it via ourspace. | |
| - Patient with high phenytoin levels, signs of toxicity, decision made as to whether needed admission | |
| - Patient with overdose of promethazine - had taken less than a toxic dose (as stated by toxbase) so did not require admission to hospital | |
| - I have not required use of Toxbase so far during this attachment. | |
| - I used to use it in when I worked GPST in A&E. Then had a login for a long time after that and found it very useful when I was going to see people who had taken overdoses either on the ward on in A&E. I think it's also useful for us to be able to discuss cases with doctors in A&E to ensure double safety when life is quite busy for the doctors in A&E | |
| - Overdose of levothyroxine on the ward when on call | |
| - I hjave phoned them and to get information, which has been very useful. | |
| - When I worked in A&E. | |

| **Other comments** |  |
| --- | --- |
| - Thanks for addressing an unmet need | |
| - I have been on a corporate secondment but can not recall seeing any communication about toxbase. I do not know what it is. | |
| - I tried to access it by searching on ourspace as patient took od. found an old invalid logon. | |
| - phoned poison hotline instead who are always helpful. | |
| - Very useful to have toxbase on psychiatric wards as overdoses are common | |
| - As I did not have access to toxbase I have had to call the poisons information line whilst on call for patients who have ingested toxins. This is very time consuming. Toxbase access would be much preferable!!!!!!!! | |
| - Access to Toxbase would help us provide a safer service to patients. | |
| - I know were in the process-tend to call A&E and ask for their advice and what toxbase says at the same time. | |
| - Had to call A&E Southmead for their password I did not know we had access | |
| - I think I may have access but I have never used it. | |
| - I have not heard of it |  |
| - Potentially very useful for all doctors to have access | |
